# Supplementary material for: Multidrug-Resistant Methicillin-Resistant Coagulase-Negative Staphylococci in Healthy Poultry Slaughtered for Human Consumption
Source: MDPI journal article supplement (doi:10.3390/antibiotics11030365), 2022-03-09
Supplement: s1 [file s1]

## Supplementary Materials

# Multidrug-resistant Methicillin-Resistant Coagulase-Negative Staphylococci in Healthy Poultry for Human Consumption

Vanessa Silva, Manuela Caniça, Eugénia Ferreira, Madalena Vieira-Pinto, Cândido Saraiva, José Eduardo Pereira, José Luis Capelo, Gilberto Igrejas, Patrícia Poeta

**Table S1.** Antimicrobial resistance phenotype and genotype, and SCCmec typing of CoNS isolated from poultry.

| Isolate | CoNS species     | Origin             | Antimicrobial resistance        |                                                                                                               |
|---------|------------------|--------------------|---------------------------------|---------------------------------------------------------------------------------------------------------------|
|         |                  |                    | Phenotype                       | Genotype                                                                                                      |
| VS3026  | <i>S. lentus</i> | Homebred chicken   | CIP, TOB, KAN, ERY, CD, TET     | <i>ermB</i> , <i>aph(3')</i> -IIIa, <i>ant(4')</i> -Ia, <i>tetL</i>                                           |
| VS3027  | <i>S. lentus</i> | Homebred chicken   | CIP, TOB, ERY, CD, TET          | <i>ermC</i> , <i>ant(4')</i> -Ia, <i>tetK</i>                                                                 |
| VS3028  | <i>S. lentus</i> | Homebred chicken   | CIP, TOB, KAN, ERY, CD, SXT     | <i>ermB</i> , <i>aph(3')</i> -IIIa, <i>ant(4')</i> -Ia, <i>dfrK</i>                                           |
| VS3029  | <i>S. lentus</i> | Homebred chicken   | CIP, TOB, KAN, ERY, CD          | <i>ermC</i> , <i>mphC</i> , <i>aph(3')</i> -IIIa, <i>ant(4')</i> -Ia                                          |
| VS3030  | <i>S. lentus</i> | Homebred chicken   | CIP, ERY, CD, C, SXT            | <i>ermA</i> , <i>ermC</i> , <i>mphC</i> , <i>dfrD</i> , <i>dfrK</i> , <i>cat<sub>p194</sub></i>               |
| VS3031  | <i>S. lentus</i> | Homebred chicken   | CIP, ERY, CD                    | <i>mphC</i>                                                                                                   |
| VS3032  | <i>S. lentus</i> | Homebred chicken   | PEN, CIP, ERY, CD, TET          | <i>ermC</i> , <i>tetL</i>                                                                                     |
| VS3033  | <i>S. lentus</i> | Homebred chicken   | PEN, CIP, ERY, CD, TET          | <i>ermC</i> , <i>mphC</i> , <i>tetK</i>                                                                       |
| VS3034  | <i>S. lentus</i> | Homebred chicken   | PEN, TOB, KAN, ERY, CD, TET, FD | <i>ermB</i> , <i>ermC</i> , <i>mphC</i> , <i>aph(3')</i> -IIIa, <i>ant(4')</i> -Ia, <i>tetL</i> , <i>tetK</i> |
| VS3035  | <i>S. lentus</i> | Homebred chicken   | PEN, CIP, ERY, CD               | <i>ermC</i> , <i>mphC</i>                                                                                     |
| VS3036  | <i>S. sciuri</i> | Homebred chicken   | PEN, TOB, KAN, ERY, CD, TET     | <i>ermB</i> , <i>aph(3')</i> -IIIa, <i>ant(4')</i> -Ia, <i>tetL</i> , <i>tetK</i>                             |
| VS3037  | <i>S. lentus</i> | Commercial chicken | CIP, ERY, CD, TET               | <i>mphC</i> , <i>tetL</i>                                                                                     |

|        |                                          |                    |                                               |                                                                           |
|--------|------------------------------------------|--------------------|-----------------------------------------------|---------------------------------------------------------------------------|
| VS3038 | <i>S. lentus</i>                         | Commercial chicken | CIP, ERY, CD, FD                              | <i>ermA, ermC, mphC</i>                                                   |
| VS3039 | <i>S. lentus</i>                         | Commercial chicken | PEN, CIP, ERY, CD                             | <i>ermC</i>                                                               |
| VS3040 | <i>S. lentus</i>                         | Commercial chicken | PEN, FOX, CIP, CN, TOB, KAN, ERY, CD, TET     | <i>ermA, ermC, aph(3')-IIIa, tetL, tetM</i>                               |
| VS3041 | <i>S. lentus</i>                         | Commercial chicken | PEN, FOX+D19:D21, ERY, CD, FD                 | <i>ermC, mphC</i>                                                         |
| VS3042 | <i>S. lentus</i>                         | Commercial chicken | PEN, CIP, ERY, CD                             | <i>ermA, ermC, mphC,</i>                                                  |
| VS3043 | <i>S. lentus</i>                         | Commercial chicken | PEN, CIP, ERY, CD                             | <i>ermA, ermB, ermC, mphC</i>                                             |
| VS3044 | <i>S. lentus</i>                         | Commercial chicken | PEN, ERY, CD                                  | <i>ermC, mphC</i>                                                         |
| VS3045 | <i>S. lentus</i>                         | Commercial chicken | PEN, ERY, CD, TET                             | <i>ermA, ermC, mphC, tetL, tetM,</i>                                      |
| VS3046 | <i>S. lentus</i>                         | Commercial chicken | PEN, FOX, CIP, TOB, KAN, TET, C, SXT          | <i>ermA, ermC, mphC, aph(3')-IIIa, ant(4')-Ia, tetL, dfrD, dfrK, fexA</i> |
| VS3047 | <i>S. lentus</i>                         | Commercial chicken | PEN, ERY, CD, TET                             | <i>ermC, mphC, tetL</i>                                                   |
| VS3048 | <i>S. cohnii</i> spp. <i>urealyticus</i> | Commercial chicken | PEN, FOX, ERY, CD, TET, FD                    | <i>ermB, mphC</i>                                                         |
| VS3049 | <i>S. cohnii</i> spp. <i>urealyticus</i> | Commercial chicken | PEN, ERY, CD, TET                             | <i>ermA, ermC, mphC, tetL, tetM, tetK</i>                                 |
| VS3050 | <i>S. lentus</i>                         | Quail              | PEN, TOB, ERY, CD, TET, FD                    | <i>ermA, ermB, mphC, aph(3')-IIIa, ant(4')-Ia, tetL, tetK</i>             |
| VS3051 | <i>S. lentus</i>                         | Quail              | PEN, FOX, CIP, CN, TOB, KAN, ERY, CD, TET, FD | <i>ermC, mphC, str, tetK, tetO</i>                                        |
| VS3052 | <i>S. lentus</i>                         | Quail              | PEN, CIP, ERY, CD, TET, FD, SXT               | <i>ermC, mphC, tetL, dfrK</i>                                             |
| VS3053 | <i>S. lentus</i>                         | Quail              | CIP, ERY, CD, TET, C, FD                      | <i>mecA, ermC, mphC,</i>                                                  |
| VS3054 | <i>S. lentus</i>                         | Quail              | PEN, CIP, ERY, CD, TET, FD                    | <i>ermC, mphC, tetK</i>                                                   |
| VS3055 | <i>S. lentus</i>                         | Quail              | PEN, CIP, ERY, CD, TET, FD                    | <i>ermC, mphC, tetK, tetL</i>                                             |
| VS3056 | <i>S. lentus</i>                         | Quail              | PEN, CIP, ERY, CD, TET, FD                    | <i>ermC, mphC, tetK</i>                                                   |
| VS3057 | <i>S. lentus</i>                         | Quail              | PEN, CIP, ERY, CD, TET, C, FD, SXT            | <i>ermC, mphC, tetL, dfrK</i>                                             |

|        |                  |       |                                             |                                                                  |
|--------|------------------|-------|---------------------------------------------|------------------------------------------------------------------|
| VS3058 | <i>S. lentus</i> | Quail | PEN, CIP, TOB,<br>ERY, CD, TET              | <i>ermB, mphC, ant(4')-Ia,<br/>tetL, tetK</i>                    |
| VS3059 | <i>S. lentus</i> | Quail | PEN, ERY, CD, TET,<br>FD                    | <i>ermC, tetL, tetK</i>                                          |
| VS3060 | <i>S. lentus</i> | Quail | PEN, CIP, TOB,<br>ERY, CD, TET              | <i>ermB, mphC, ant(4')-Ia,<br/>tetL, tetK</i>                    |
| VS3061 | <i>S. lentus</i> | Quail | PEN, TOB, ERY, CD,<br>TET                   | <i>ermC, mphC, ant(4')-Ia,<br/>tetL, tetK</i>                    |
| VS3062 | <i>S. lentus</i> | Quail | PEN, TOB, KAN,<br>ERY, CD, TET              | <i>ermC, mphC, aph(3')-<br/>IIIa, ant(4')-Ia, tetK, tetL</i>     |
| VS3063 | <i>S. lentus</i> | Quail | PEN, ERY, CD, TET                           | <i>ermC, mphC, tetL, tetK</i>                                    |
| VS3064 | <i>S. lentus</i> | Quail | PEN, CIP, TOB,<br>KAN, ERY, CD,<br>TET, SXT | <i>ermB, mphC, aph(3')-IIIa,<br/>ant(4')-Ia, str, tetL, dfrK</i> |
| VS3065 | <i>S. sciuri</i> | Quail | PEN, TOB, ERY, CD,<br>TET, FD               | <i>ermB, ant(4')-Ia, tetL,<br/>tetK</i>                          |
| VS3066 | <i>S. sciuri</i> | Quail | PEN, TOB, KAN,<br>ERY, CD, TET, FD          | <i>ermB, aph(3')-IIIa,<br/>ant(4')-Ia, tetL, tetK,<br/>tetO</i>  |
| VS3067 | <i>S. sciuri</i> | Quail | PEN, FOX, CD, TET,<br>FD                    | <i>tetK</i>                                                      |
| VS3068 | <i>S. sciuri</i> | Quail | PEN, CIP, TOB,<br>ERY, CD, TET, FD          | <i>ermC, tetL, tetK</i>                                          |
| VS3069 | <i>S. sciuri</i> | Quail | PEN, CIP, TOB,<br>ERY, CD, TET, FD          | <i>ermC, ant(4')-Ia, str</i>                                     |
| VS3070 | <i>S. sciuri</i> | Quail | PEN, TOB, KAN,<br>ERY, CD, TET, FD          | <i>ermB, mphC, ant(4')-Ia,<br/>ant(4')-Ia, tetL, tetK</i>        |
| VS3071 | <i>S. sciuri</i> | Quail | PEN, CIP, ERY, CD,<br>TET                   | <i>ermC, mphC, tetK</i>                                          |
| VS3072 | <i>S. sciuri</i> | Quail | PEN, FOX, ERY, CD,<br>TET, C, FD            | <i>ermB, ermC, mphC, tetL,<br/>tetK, tetM</i>                    |
| VS3073 | <i>S. sciuri</i> | Quail | PEN, TOB, ERY, CD,<br>TET                   | <i>ermB, mphC, ant(4')-Ia,<br/>tetL, tetK</i>                    |
| VS3074 | <i>S. sciuri</i> | Quail | PEN, CIP, TOB,<br>KAN, ERY, CD,<br>TET, SXT | <i>ermC, mphC, aph(3')-<br/>IIIa, ant(4')-Ia, tetK</i>           |
| VS3075 | <i>S. sciuri</i> | Quail | ERY, CD, TET, SXT                           | <i>ermB, mphC, tetL, dfrK</i>                                    |
| VS3076 | <i>S. sciuri</i> | Quail | PEN, FOX, ERY, CD,<br>TET, FD               | <i>ermB, ermC, mphC, tetL,<br/>tetK, tetO, tetM</i>              |
| VS3077 | <i>S. sciuri</i> | Quail | PEN, FOX, LNZ,<br>ERY, CD, TET, C, FD       | <i>cfr, ermB, ermC, mphC,<br/>tetL, tetK, tetM</i>               |

|        |                                             |       |                                                     |                                                                                |
|--------|---------------------------------------------|-------|-----------------------------------------------------|--------------------------------------------------------------------------------|
| VS3078 | <i>S. sciuri</i>                            | Quail | PEN, FOX, CD, TET,<br>FD                            | <i>mphC, tetL</i>                                                              |
| VS3079 | <i>S. cohnii</i> spp.<br><i>urealyticus</i> | Quail | PEN, FOX, ERY, CD,<br>TET                           | <i>ermC, mphC, tetL, tetK,</i>                                                 |
| VS3080 | <i>S. cohnii</i> spp.<br><i>urealyticus</i> | Quail | PEN, FOX, CIP, CN,<br>ERY, CD, TET, C, FD           | <i>ermB, ermC, mphC, tetK,</i><br><i>tetO</i>                                  |
| VS3081 | <i>S. cohnii</i> spp.<br><i>urealyticus</i> | Quail | PEN, FOX, CN,<br>TOB, ERY, CD, TET,<br>FD           | <i>ermB, ermC, mphC,</i><br><i>ant(4')-Ia, str, tetK, tetL,</i><br><i>tetO</i> |
| VS3082 | <i>S. cohnii</i> spp.<br><i>urealyticus</i> | Quail | PEN, FOX, ERY, CD,<br>TET, FD                       | <i>ermC, tetL, tetK, tetO</i>                                                  |
| VS3083 | <i>S. cohnii</i> spp.<br><i>urealyticus</i> | Quail | PEN, TOB, KAN,<br>ERY, CD, TET                      | <i>ermC, mphC, aph(3')-</i><br><i>IIIa, ant(4')-Ia, tetK, tetL</i>             |
| VS3084 | <i>S. cohnii</i> spp.<br><i>urealyticus</i> | Quail | PEN, FOX, ERY, CD,<br>TET, FD                       | <i>ermB, mphC, tetL, tetK,</i><br><i>tetO, tetM</i>                            |
| VS3085 | <i>S. cohnii</i> spp.<br><i>urealyticus</i> | Quail | PEN, FOX, ERY, CD,<br>TET, FD                       | <i>ermC, mphC, tetL, tetK</i>                                                  |
| VS3086 | <i>S. cohnii</i> spp.<br><i>urealyticus</i> | Quail | PEN, FOX, CIP, CN,<br>TOB, KAN, ERY,<br>CD, TET, FD | <i>ermB, ermC, mphC,</i><br><i>aph(3')-IIIa</i>                                |
| VS3087 | <i>S. cohnii</i> spp.<br><i>urealyticus</i> | Quail | PEN, FOX, ERY, CD,<br>TET, FD                       | <i>ermB, ermC, mphC, tetL,</i><br><i>tetK, tetO, tetM</i>                      |
| VS3088 | <i>S. cohnii</i> spp.<br><i>urealyticus</i> | Quail | PEN, FOX, ERY, CD,<br>TET, FD                       | <i>ermC, mphC, tetL, tetK,</i><br><i>tetO</i>                                  |
| VS3089 | <i>S. cohnii</i> spp.<br><i>urealyticus</i> | Quail | PEN, FOX, ERY, CD,<br>TET, FD                       | <i>ermB, ermC, mphC, tetL,</i><br><i>tetK, tetO</i>                            |
| VS3090 | <i>S. cohnii</i> spp.<br><i>urealyticus</i> | Quail | PEN, FOX, CN,<br>TOB, KAN, ERY,<br>CD, TET, FD      | <i>ermC, mphC, aph(3')-</i><br><i>IIIa, str, tetL, tetK, tetO</i>              |
| VS3091 | <i>S. cohnii</i> spp.<br><i>urealyticus</i> | Quail | PEN, FOX, ERY, CD,<br>TET, FD                       | <i>ermC, mphC, tetL, tetK,</i><br><i>tetO</i>                                  |
| VS3092 | <i>S. cohnii</i> spp.<br><i>urealyticus</i> | Quail | PEN, FOX, ERY, CD,<br>TET                           | <i>ermC, mphC</i>                                                              |
| VS3093 | <i>S. cohnii</i> spp.<br><i>urealyticus</i> | Quail | PEN, FOX, ERY, CD,<br>TET, FD                       | <i>ermC, tetL, tetK, tetO</i>                                                  |
| VS3094 | <i>S. cohnii</i> spp.<br><i>urealyticus</i> | Quail | PEN, FOX, TOB,<br>KAN, ERY, CD,<br>TET, C, FD       | <i>ermC, aph(3')-IIIa, tetL,</i><br><i>tetK</i>                                |
| VS3095 | <i>S. cohnii</i> spp.<br><i>urealyticus</i> | Quail | PEN, FOX, ERY, CD,<br>TET, FD                       | <i>ermC, mphC, tetL, tetK,</i><br><i>tetO, tetM</i>                            |
| VS3096 | <i>S. cohnii</i> spp.<br><i>urealyticus</i> | Quail | PEN, FOX, TOB,<br>KAN, ERY, CD,<br>TET, C, FD       | <i>ermC, aph(3')-IIIa, tetL,</i><br><i>tetK, tetO</i>                          |
| VS3097 | <i>S. cohnii</i> spp.<br><i>urealyticus</i> | Quail | PEN, CIP, ERY, CD,<br>TET, FD                       | <i>ermC, tetL, tetK, tetO</i>                                                  |

|        |                        |       |                                       |                                                              |
|--------|------------------------|-------|---------------------------------------|--------------------------------------------------------------|
| VS3098 | <i>S. haemolyticus</i> | Quail | PEN, CIP, TOB, TET, FD                | <i>aph(3')-IIIa, tetL</i>                                    |
| VS3099 | <i>S. haemolyticus</i> | Quail | PEN, CIP, TOB, KAN, ERY, CD, TET, SXT | <i>ermC, mphC, aph(3')-IIIa, ant(4')-Ia, str, tetL, dfrK</i> |
| VS3100 | <i>S. haemolyticus</i> | Quail | PEN, FOX, ERY, CD, TET, FD            | <i>ermB, ermC, mphC, tetL, tetK</i>                          |

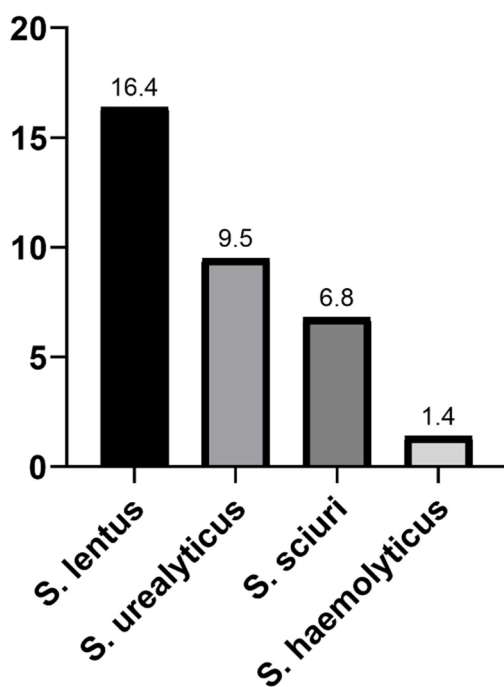

**Figure S1.** Prevalence of each staphylococci specie in poultry samples.

**Table S2.** Primer pairs used for molecular typing and detection of antimicrobial resistance genes in MRSA strains.

| Gene<br>(am-<br>plicon<br>size) | Sequence (5' > 3')                                   | Conditions                                            | Reference |
|---------------------------------|------------------------------------------------------|-------------------------------------------------------|-----------|
|                                 |                                                      | 94 °C 5 min 1 cycle                                   |           |
| <i>mecA</i><br>(527 bp)         | F: GGGATCATAGCGTCATTATTC<br>R: AACGATTGTGACACGATAGCC | 94 °C 30 sec<br>55 °C 30 sec 30 cycles<br>72 °C 1 min | [56]      |
|                                 |                                                      | 72 °C 10 min 1 cycle<br>94 °C 3 min 1 cycle           |           |
| <i>blaZ</i><br>(772 bp)         | F: CAGTTCACATGCCAAAGAG<br>R: TACACTCTTGGCGGTTTC      | 94 °C 1 min<br>50 °C 1 min 30 cycles<br>72 °C 2 min   | [57]      |

---

|                             |                                                                               |                                                        |      |
|-----------------------------|-------------------------------------------------------------------------------|--------------------------------------------------------|------|
|                             |                                                                               | 72 °C 5 min 1 cycle                                    |      |
| <i>ermA</i><br>(645 bp)     | F: TCTAAAAAGCATGTAAAAGAA<br>R: CTTCGATAGTTTATTAATATTAG                        | 93 °C 3 min 1 cycle                                    | [58] |
| <i>ermB</i><br>(639 bp)     | F: GAAAAGTACTCAACCAAATA<br>R: AGTAACGGTACTTAAATTGTTTA                         | 93 °C 1 min<br>52 °C 1 min 35 cycles<br>72 °C 1 min    | [59] |
| <i>ermC</i><br>(642 bp)     | F: TCAAAACATAATATAGATAAA<br>R: GCTAATATTGTTTAAATCGTCAAT                       | 72 °C 5 min 1 cycle                                    | [58] |
|                             |                                                                               | 94 °C 3 min 1 cycle                                    |      |
| <i>ermT</i><br>(200 bp)     | F: CCGCCATTGAAATAGATCCT<br>R: TTCTGTAGCTGTGCTTTCAAAAA                         | 94 °C 1 min<br>55 °C 1 min 30 cycles<br>72 °C 1 min    | [60] |
|                             |                                                                               | 72 °C 5 min 1 cycle<br>95 °C 3 min 1 cycle             |      |
| <i>msr(A/B)</i><br>(399 bp) | F: GCAAATGGTGTAGGTAAGACAAC<br>R: ATCATGTGATGTAAACAAAAT                        | 93 °C 30 sec<br>55 °C 2 min 35 cycles<br>72 °C 1,5 min | [61] |
|                             |                                                                               | 72 °C 5 min 1 cycle<br>94 °C 3 min 1 cycle             |      |
| <i>mph(C)</i><br>(900 bp)   | F: ATGACTCGACATAATGAAAT<br>R: CTACTCTTTCATACCTAACTC                           | 94 °C 1 min<br>45 °C 1 min 30 cycles<br>72 °C 1 min    | [57] |
|                             |                                                                               | 72 °C 5 min 1 cycle<br>94 °C 2 min 1 cycle             |      |
| <i>lnu(A)</i><br>(323 bp)   | F: GGTGGCTGGGGGGTAGATGTATTAAGTGG<br>R: GCTTCTTTTGAAATACATGG-<br>TATTTTTTCGATC | 94 °C 30 sec<br>57 °C 30 sec 30 cycles<br>72 °C 1 min  | [62] |
|                             |                                                                               | 72 °C 10 min 1 cycle<br>94 °C 5 min 1 cycle            |      |
| <i>lnu(B)</i><br>(944 bp)   | F: CCTACCTATTGTTTGTGGAA<br>R: ATAACGTTACTCTCCTATTC                            | 94 °C 45 sec<br>54 °C 45 sec 30 cycles<br>72 °C 1 min  | [63] |
|                             |                                                                               | 72 °C 5 min 1 cycle<br>94 °C 3 min 1 cycle             |      |
| <i>vga(A)</i><br>(1264 bp)  | F: AGTGGTGGTGAAGTAACACG<br>R: GGTTCATACTCAATCGACTGAG                          | 94 °C 1 min<br>56 °C 1 min 30 cycles<br>72 °C 1 min    | [64] |

---

|                                                                               |                                                     |                                                           |      |
|-------------------------------------------------------------------------------|-----------------------------------------------------|-----------------------------------------------------------|------|
|                                                                               |                                                     | 72 °C 5 min 1 cycle<br>94 °C 1 min 1 cycle                |      |
| <i>vga</i> (B)<br>(576 bp)                                                    | F: TGACAATATGAGTGGTGGTG<br>R: GCGACCATGAAATTGCTCTC  | 94 °C 1 min<br>55 °C 2 min 30 cycles<br>72 °C 2 min       | [65] |
| <i>tetK</i><br>(697 bp)                                                       | F: TTAGGTGAAGGGTTAGGTCC<br>R: GCAAACCTCATTCCAGAAGCA | 72 °C 10 min 1 cycle<br>94 °C 3 min 1 cycle               | [66] |
| <i>tetM</i><br>(576 bp)                                                       | F: GTTAAATAGTGTTCTTGGAG<br>R: CTAAGATATGGCTCTAACAA  | 94 °C 1 min<br>54 °C 1 min 30 cycles<br>72 °C 1 min       | [66] |
| <i>tetO</i><br>(615 bp)                                                       | F: GATGGCATACAGGCACAGAC<br>R: CAATATCACCAGAGCAGGCT  | 72 °C 5 min 1 cycle<br>94 °C 1 min 1 cycle                | [66] |
| <i>tetL</i><br>(456 bp)                                                       | F: CATTTGGTCTTATTGGATCG<br>R: ATTACACTTCCGATTTCCG   | 94 °C 1 min<br>50 °C 1 min 30 cycles<br>72 °C 1 min       | [66] |
| <i>aac</i> (6')-<br><i>Ie</i> -<br><i>aph</i> (2'')-<br><i>Ia</i><br>(220 bp) | F: CCAAGAGCAATAAGGGCATA<br>R: CACTATCATAACCACTACCG  | 72 °C 10 min 1 cycle<br>94 °C 5 min 1 cycle               | [67] |
|                                                                               |                                                     | 94 °C 30 sec<br>60 °C 45 sec 30 cycles<br>72 °C 2 min     |      |
| <i>ant</i> (4')- <i>Ia</i><br>(160 bp)                                        | F: GCAAGGACCGACAACATTTTC<br>R: TGGCACAGATGGTCATAACC | 72 °C 7 min 1 cycle<br>94 °C 3 min 1 cycle                | [67] |
|                                                                               |                                                     | 94 °C 30 sec<br>60 °C 45 sec 30 cycles<br>72 °C 2 min     |      |
| <i>str</i><br>(646 bp)                                                        | F: TATTGCTCTCGAGGGTTC<br>R: CTTTCTATATCCATTCATCTC   | 72 °C 5 min 1 cycle<br>94 °C 3 min 1 cycle                | [57] |
|                                                                               |                                                     | 94 °C 1 min<br>50 °C 1 min 30 cycles<br>72 °C 1 min       |      |
| <i>aph</i> (3')-<br><i>III</i><br>(292 bp)                                    | F: GCCGATGTGGATTGCGAAAA<br>R: GCTTGATCCCCAGTAAGTCA  | 72 °C 5 min 1 cycle<br>94 °C 3 min 1 cycle                | [67] |
|                                                                               |                                                     | 94 °C 30 sec<br>60 °C 45 sec 30 cycles<br>72 °C 2 min     |      |
| <i>fexA</i><br>(1272 bp)                                                      | F: GTACTTGTAGGTGCAATTACGGCTGA                       | 72 °C 5 min 1 cycle<br>94 °C 1 min 1 cycle<br>94 °C 1 min | [68] |

|                                        |                                                                 |                                                        |      |
|----------------------------------------|-----------------------------------------------------------------|--------------------------------------------------------|------|
|                                        | R: CGCATCTGAGTAGGACATAGCGTC                                     | 48 °C 2 min 34 cycles<br>72 °C 3 min                   |      |
|                                        |                                                                 | 72 °C 7 min 1 cycle<br>94 °C 7min<br>min 1 cycle       |      |
| <i>fexB</i><br>(816 bp)                | F: TTCCCACTATTGGTGAAAGGAT<br>R: GCAATTCCTTTTATGGACGTT           | 94 °C 1 min<br>55 °C 1 min 30 cycles<br>72 °C 1 min    | [69] |
|                                        |                                                                 | 72 °C 10 min 1 cycle                                   |      |
| <i>cat<sub>pC194</sub></i><br>(570 bp) | F: CGACTTTTAGTATAACCACAGA<br>R: GCCAGTCATTAGGCCTAT              | 94 °C 3 min 1 cycle                                    | [57] |
| <i>cat<sub>pC221</sub></i><br>(434 bp) | F: ATTTATGCAATTATGGAAGTTG<br>R: TGAAGCATGGTAACCATCAC            | 94 °C 1 min<br>50 °C 1 min 30 cycles<br>72 °C 1 min    | [57] |
| <i>cat<sub>pC223</sub></i><br>(283 bp) | F: GAATCAAATGCTAGTTTAACTC<br>R: ACATGGTAACCATCACATAC            | 72 °C 5 min 1 cycle<br>94 °C 3 min 1 cycle             | [57] |
| <i>cfr</i><br>(746 bp)                 | F: TGAAGTATAAAGCAGGTTGGGAGTCA<br>R: ACCATATAATTGACCACAAGCAGC    | 94 °C 1 min<br>56 °C 1 min 30 cycles<br>72 °C 1 min    | [70] |
|                                        |                                                                 | 72 °C 5 min 1 cycle<br>94 °C 3 min 1 cycle             |      |
| <i>fusB</i><br>(431 bp)                | F: CTATAATGATATTAATGAGATTTTTGG<br>R: TTTTACATATTGACCATCCGAATTGG | 94 °C 30 sec<br>57 °C 30 sec 25 cycles<br>72 °C 45 sec | [70] |
| <i>fusC</i><br>(332 bp)                | F: TTAAAGAAAAAGATATTGATATCTCGG<br>R: TTTACAGAATCCTTTTACTTTATTGG | 72 °C 7 min 1 cycle<br>94 °C 7 min 1 cycle             |      |
| <i>fusD</i><br>(456 bp)                | F: AATTCGGTCAACGATCCC<br>R: GCCATCATTGCCAGTACG                  | 94 °C 30 sec<br>57 °C 30 sec 30 cycles<br>72 °C 30 sec | [71] |
|                                        |                                                                 | 72 °C 10 min 1 cycle<br>94 °C 3 min 1 cycle            |      |
| <i>dfrA</i><br>(374 bp)                | F: CCTTGGCACTTACCAAATG<br>R: CTGAAGATTCGACTTCCC                 | 94 °C 1 min<br>50 °C 1 min 30 cycles<br>72 °C 1 min    | [57] |
| <i>dfrD</i><br>(582 bp)                | F: TTCTTTAATTGTTGCGATGG<br>R: TTAACGAATTCTCTCATATATATG          | 72 °C 5 min 1 cycle<br>94 °C 3 min 1 cycle             |      |
| <i>dfrG</i><br>(323 bp)                | F: TCGGAAGAGCCTTACCTGACAGAA<br>R: CCCTTTTTGGGCAAATACCTCATTC     | 94 °C 1 min                                            | [60] |



---

58 °C 1 min 30 cycles  
72 °C 1 min

72 °C 5 min 1 cycle  
94 °C 3 min 1 cycle

*dfpK* F: GAGAATCCCAGAGGATTGGG  
(423 bp) R: CAAGAAGCTTTTCGCTCATAAA

94 °C 1 min  
56 °C 1 min 30 cycles  
72 °C 1 min

72 °C 5 min 1 cycle

---

- [56] Zhang, K., Sparling, J., Chow, B.L., Elsayed, S., Hussain, Z., Church, D.L., Gregson, D.B., Louie, T., Conly, J.M., 2004, New quadruplex PCR assay for detection of methicillin and mupirocin resistance and simultaneous discrimination of *Staphylococcus aureus* from coagulase-negative staphylococci. *J Clin Microbiol* 42, 4947-4955.
- [57] Schnellmann, C., Gerber, V., Rossano, A., Jaquier, V., Panchaud, Y., Doherr, M.G., Thomann, A., Straub, R., Perreten, V., 2006, Presence of new *mecA* and *mph(C)* variants conferring antibiotic resistance in *Staphylococcus* spp. isolated from the skin of horses before and after clinic admission. *J Clin Microbiol* 44, 4444-4454.
- [58] Sutcliffe, J., Grebe, T., Tait-Kamradt, A., Wondrack, L., 1996, Detection of erythromycin-resistant determinants by PCR. *Antimicrob Agents Chemother* 40, 2562-2566.
- [59] Shopsin, B., Mathema, B., Alcabes, P., Said-Salim, B., Lina, G., Matsuka, A., Martinez, J., Kreiswirth, B.N., 2003, Prevalence of *agr* specificity groups among *Staphylococcus aureus* strains colonizing children and their guardians. *J Clin Microbiol* 41, 456-459.
- [60] Gomez-Sanz, E., Torres, C., Lozano, C., Fernandez-Perez, R., Aspiroz, C., Ruiz-Larrea, F., Zarazaga, M., 2010, Detection, molecular characterization, and clonal diversity of methicillin-resistant *Staphylococcus aureus* CC398 and CC97 in Spanish slaughter pigs of different age groups. *Foodborne Pathog Dis* 7, 1269-1277.
- [61] Wondrack, L., Massa, M., Yang, B.V., Sutcliffe, J., 1996, Clinical strain of *Staphylococcus aureus* inactivates and causes efflux of macrolides. *Antimicrob Agents Chemother* 40, 992-998.
- [62] Lina, G., Quaglia, A., Reverdy, M.E., Leclercq, R., Vandenesch, F., Etienne, J., 1999, Distribution of genes encoding resistance to macrolides, lincosamides, and streptogramins among staphylococci. *Antimicrob. Agents Chemother.* 43, 1062-1066.
- [63] Bozdogan, B., Berrezouga, L., Kou, M.S., Yurek, D.A., Farley, K.A., Stockman, B.J., Leclercq, R., 1999, A new resistance gene, *linB*, conferring resistance to lincosamides by nucleotidylation in *Enterococcus faecium* HM1025. *Antimicrob. Agents Chemother.* 43, 925-929.
- [64] Lozano C, Aspiroz C, Rezusta A, Gómez-Sanz E, Simon C, Gómez P, Ortega C, Revillo MJ, Zarazaga M, Torres C. Identification of novel *vga(A)*-carrying plasmids and a Tn5406-like transposon in methicillin-resistant *Staphylococcus aureus* and *Staphylococcus epidermidis* of human and animal origin. *Int J Antimicrob Agents.* 2012 Oct;40(4):306-12.
- [65] Hammerum, A.M., Jensen, L.B., Aarestrup, F.M., 1998, Detection of the *satA* gene and transferability of virginiamycin resistance in *Enterococcus faecium* from food- animals. *FEMS Microbiol. Lett.* 168, 145-151.
- [66] Aarestrup, F.M., Agers, L.Y., Ahrens, P., JC, J.L., Madsen, M., Jensen, L.B., 2000, Antimicrobial susceptibility and presence of resistance genes in staphylococci from poultry. *Vet Microbiol* 74, 353-364.
- [67] Van de Klundert, J.A.M., Vliegthart, J.S., 1993, PCR detection of genes coding for aminoglycoside-modifying enzymes, in: Persing, D.H., Smith, T.F., Tenover, F.C., White, T.J. (Eds.), *Diagnostic Molecular Microbiology: Principles and Applications*. American Society for Microbiology, Washington D.C., pp. 547-552.
- [68] Kehrenberg, C., Schwarz, S., 2006, Distribution of Florfenicol Resistance Genes *fexA* and *cfr* among Chloramphenicol-Resistant *Staphylococcus* Isolates. *Antimicrob. Agents Chemother.* 50, 1156-1163.
- [69] Liu, H., Wang, Y., Wu, C., Schwarz, S., Shen, Z., Jeon, B., Ding, S., Zhang, Q., Shen, J., 2012, A novel phenicol exporter gene, *fexB*, found in enterococci of animal origin. *J. Antimicrob. Chemother.* 67, 322-325.
- [70] Mclaws, F., Chopra, I., O'Neill, A.J., 2008, High prevalence of resistance to fusidic acid in clinical isolates of *Staphylococcus epidermidis*. *J. Antimicrob. Chemother.* 61, 1040-1043.
- [71] Chen, H.J., Hung, W.C., Tseng, S.P., Tsai, J.C., Hsueh, P.R., Teng, L.J., 2010, Fusidic acid resistance determinants in *Staphylococcus aureus* clinical isolates. *Antimicrob. Agents Chemother.* 54, 4985- 4991.
